# Performance of convolutional neural networks for identification of bacteria in 3D microscopy datasets

Edouard A Hay<sup>1</sup>, Raghuveer Parthasarathy<sup>1</sup>

<sup>1</sup> Department of Physics, Institute of Molecular Biology, Materials Science Institute, University of Oregon, Eugene, Oregon

\* raghu@uoregon.edu

## Abstract

Three-dimensional microscopy is increasingly prevalent in biology due to the development of techniques such as multiphoton, spinning disk confocal, and light sheet fluorescence microscopies. These methods enable unprecedented studies of life at the microscale, but bring with them larger and more complex datasets. New image processing techniques are therefore called for to analyze the resulting images in an accurate and efficient manner. Convolutional neural networks are becoming the standard for classification of objects within images due to their accuracy and generalizability compared to traditional techniques. Their application to data derived from 3D imaging, however, is relatively new and has mostly been in areas of magnetic resonance imaging and computer tomography. It remains unclear, for images of discrete cells in variable backgrounds as are commonly encountered in fluorescence microscopy, whether convolutional neural networks provide sufficient performance to warrant their adoption, especially given the challenges of human comprehension of their classification criteria and their requirements of large training datasets. We therefore applied a 3D convolutional neural network to distinguish bacteria and non-bacterial objects in 3D light sheet fluorescence microscopy images of larval zebrafish intestines. We find that the neural network is as accurate as human experts, outperforms random forest and

support vector machine classifiers, and generalizes well to a different bacterial species through the use of transfer learning. We also discuss network design considerations, and describe the dependence of accuracy on dataset size and data augmentation. We provide source code, labeled data, and descriptions of our analysis pipeline to facilitate adoption of convolutional neural network analysis for three-dimensional microscopy data.

## Author summary

The abundance of complex, three dimensional image datasets in biology calls for new image processing techniques that are both accurate and fast. Deep learning techniques, in particular convolutional neural networks, have achieved unprecedented accuracies and speeds across a large variety of image classification tasks. However, it is unclear whether or not their use is warranted in noisy, heterogeneous 3D microscopy datasets, especially considering their requirements of large, labeled datasets and their lack of comprehensible features. To assess this, we provide a case study, applying convolutional neural networks as well as feature-based methods to light sheet fluorescence microscopy datasets of bacteria in the intestines of larval zebrafish. We find that the neural network is as accurate as human experts, outperforms the feature-based methods, and generalizes well to a different bacterial species through the use of transfer learning.

## Introduction

The continued development and widespread adoption of three-dimensional microscopy methods enables insightful observations into the structure and time-evolution of living systems. Techniques such as confocal microscopy [1,2], two-photon excitation microscopy [3–6], and light sheet fluorescence microscopy [6–12] have provided insights into neural activity, embryonic morphogenesis, plant root growth, gut bacterial competition, and more. Extracting quantitative information from biological image data often calls for identification of objects such as cells, organs, or organelles in an array of pixels, a task that can especially challenging for three-dimensional datasets from live imaging due to their large size and potentially complex backgrounds. Aberrations and scattering in deep tissue can, for example, introduce noise and distortions, and live

animals often contain autofluorescent biomaterials that complicate the discrimination of 12  
labeled features of interest. Moreover, traditional image processing techniques tend to 13  
require considerable manual curation, as well as user input regarding which features, 14  
such as cell size, homogeneity, or aspect ratio, should guide and parameterize analysis 15  
algorithms. These features may be difficult to know a priori, and need not be the 16  
features that lead to the greatest classification accuracy. As data grow in both size and 17  
complexity, and as imaging methods are applied to an ever-greater variety of systems, 18  
standard approaches become increasingly unwieldy, motivating work on better 19  
computational methods. 20

Machine learning methods, in particular convolutional neural networks (ConvNets), 21  
are increasingly used in many fields and have achieved unprecedented accuracies in 22  
image classification tasks [13–16]. The objective of machine learning is to use a labeled 23  
dataset to train a computer algorithm to make classifications or predictions given new, 24  
unlabeled data. Traditional feature-based machine learning algorithms, such as support 25  
vector machines and random forests, make use of manually determined characteristics, 26  
which in the context of image data could be the eccentricity of objects, their size, their 27  
median pixel intensity, etc. The first stages in the implementation of these algorithms, 28  
therefore, are the identification of objects by image segmentation methods and the 29  
calculation of the desired feature values. In contrast, convolutional neural networks use 30  
the raw pixel values as inputs, eliminating the need for determination of object features 31  
by the user. Convolutional neural networks use layers consisting of multiple kernels, 32  
numerical arrays acting as filters, which are convolved across the input taking advantage 33  
of locally correlated information. These kernels are updated as the algorithm is fed 34  
labeled data, converging by numerical optimization methods on the weights that best 35  
match the training data. ConvNets can contain hundreds of kernels over tens or 36  
hundreds of layers which leads to hundreds of thousands of parameters to be learned, 37  
requiring considerable computation and, importantly, large labeled datasets to constrain 38  
the parameters. Over the past decade, the use of ConvNets has been enabled by 39  
advances in GPU technology, the availability of large labeled datasets in many fields, 40  
and user-friendly deep learning software such as TensorFlow [17], Theano [18], 41  
Keras [19], and Torch [20]. In addition to high accuracy, ConvNets tend to have fast 42  
classification speeds compared to traditional image processing methods. There are 43

drawbacks, however, to neural network approaches. As noted, they require large  
amounts of manually labeled data for training the network. Furthermore, their selection  
criteria, in other words the meanings of the kernels' parameters, are not easily  
understandable by humans [21].

There have been several notable examples of machine learning methods applied to  
biological optical microscopy data [22,23], including bacterial identification from 2D  
images using deep learning [24], pixel-level image segmentation using deep  
learning [25–27], subcellular protein classification [28], and detection of structures  
within *C. elegans* from 2D projections of 3D image stacks using support vector  
machines [29]. Nonetheless, it is unclear whether ConvNet approaches are successful for  
thick, three-dimensional microscopy datasets, whether their potentially greater accuracy  
outweighs the drawbacks noted above, and what design principles should guide the  
implementation of ConvNets for 3D microscopy data.

To address these issues, we applied a deep convolutional neural network to analyze  
three-dimensional light sheet fluorescence microscopy datasets of gut bacteria in larval  
zebrafish (Fig 1 a,b) and compared its performance to that of other methods. These  
image sets, in addition to representing a major research focus of our lab related to the  
aim of understanding the structure and dynamics of gut microbial  
communities [10,30–32], serve as exemplars of the large, complex data types  
increasingly enabled by new imaging methods. Each 3D image occupies roughly 5 GB of  
storage space and consists of approximately 300 slices separated by 1 micron, each slice  
consisting of 6000 x 2000 pixel 2D images (975x325 microns). These images include  
discrete bacterial cells, strong and variable autofluorescence from the mucus-rich  
intestinal interior [33], autofluorescent zebrafish cells, inhomogeneous illumination due  
to shadowing of the light sheet by pigment cells, and noise of various sorts. The bacteria  
examined here exist predominantly as discrete, planktonic individuals. Other species in  
the zebrafish gut exhibit pronounced aggregation; identification of aggregates is outside  
the scope of this work, though we note that the segmentation of aggregates is much less  
challenging than identification of discrete bacterial cells, due to their overall brightness  
and size. The goal of the analysis described here is to correctly classify regions of high  
intensity as bacteria or as non-bacterial objects.

Using multiple testing image sets, we compared the performance of the convolutional

neural network to that of humans as well as random forest and support vector machine 76  
classifiers. In brief, the ConvNet’s accuracy is similar to that of humans, and it 77  
outperforms the other machine classifiers in both accuracy and speed across all tested 78  
datasets. In addition, the ConvNet performs well when applied to planktonic bacteria of 79  
a different genus through the use of transfer learning, in which partial transference of 80  
network weights dramatically lowers the amount of new labeled data that is required. 81  
We explored the impacts on the ConvNet’s performance of network structure, the 82  
degree of data augmentation using rotations and reflections of the input data, and the 83  
size of the training data set, providing insights that will facilitate the use of ConvNets 84  
in other biological imaging contexts. 85

Analysis code as well as all  $\sim 21,000$  manually labeled 3D image regions-of-interest 86  
are provided; see Methods for details and urls to data locations. 87

## Results 88

### Data 89

The image data we sought to classify consist of three-dimensional arrays of pixels 90  
obtained from light sheet fluorescence microscopy of bacteria in the intestines of larval 91  
zebrafish [10,30–32]. Fig 1B shows a typical optical section from an initially germ-free 92  
larval zebrafish, colonized by a single labeled bacterial species made up of discrete, 93  
planktonic individuals expressing green fluorescent protein; a three-dimensional scan is 94  
provided as Supplementary Movie 1. All the data assessed here were derived from fish 95  
that were reared germ free (devoid of any microbes) [34] and then either 96  
mono-associated with a commensal bacterial species or left germ free. Nine scans are of 97  
fish mono-associated with the commensal species ZWU0020 of the genus 98  
*Vibrio* [10,35,36], two scans are of fish in which the zebrafish remained germ-free, and a 99  
single scan is from a fish mono-associated with *Pseudomonas* ZWU0006 [31]. For each 100  
3D scan, we first determined the intestinal space of the zebrafish using simple 101  
thresholding and detected bright objects (“blobs”) using a difference of Gaussians 102  
method described further in Methods. From each blob, we extracted 28x28x8 pixel 103  
arrays (4.5x4.5x8 microns), which served as the input data to the neural network, to be 104

classified as bacterial or non-bacterial. 105

Since there is no way to obtain ground truth values for bacterial identity in images, 106  
we manually classified blobs to serve as the training data for the neural network, using 107  
our expertise derived from considerable prior work on three dimensional bacterial 108  
imaging. Notably, in prior work we showed that the total bacterial abundance 109  
determined by manually corroborated feature-based bacterial identification from light 110  
sheet data corresponds well with the total bacterial abundance as measured through gut 111  
dissection and serial plating assays [30]. In Fig 1C-F we show representative images of 112  
blobs corresponding to bacteria and noise. 113

In order to estimate an upper bound on the classification accuracy we can expect 114  
from the learning algorithms, we chose a single image scan which we judged to be 115  
typical of a noisy, complex 3D image of the intestine of a larval zebrafish colonized by 116  
bacteria. We then had six lab members with considerable light sheet microscopy 117  
experience individually label each of the detected potential objects as either a bacterium 118  
or not. We show in Fig 2A the agreement between lab members. Excluding human 3 119  
the agreement between any pair of humans is always above 0.87. The outlier, human 3, 120  
is the person with the least experience with the imaging data, namely the principal 121  
investigator. 122

We next created a set of labeled data by manual classification of blobs from the 9 123  
Vibrio scans and 2 scans of germ-free fish, consisting in total of over 20,000 objects. 124  
Including scans from germ-free fish is particularly important to enable accurate 125  
counting of low numbers of bacteria, which arise naturally due to extinction events [10] 126  
and population bottlenecks [35]. 127

## Network Architecture 128

As detailed in Methods, we used Google's open-source Tensorflow framework [2016, 129  
Abadi] to create, test, and implement 3D convolutional neural networks. Such networks 130  
have many design parameters and options, including the number, size, and type of 131  
layers, the kernel size, the downsizing of convolution output by pooling, and parameter 132  
regularization. In general, overly small networks can lack the complexity to characterize 133  
image data, though their limited parameter space is less likely to lead to overfitting. 134

Conversely, larger networks can tackle more complex classification schemes, but demand more training data to constrain the large number of parameters, and also carry a greater computational load. In between these extremes, many design variations will typically give similar classification accuracy. We chose a simple architecture consisting of two convolutional layers followed by a fully connected layer. The first and second convolutional layers contain 16 and 32  $5 \times 5 \times 2$  kernels, respectively. Each layer is followed by  $2 \times 2 \times 2$  max pooling as further described in Methods. The final layer is a fully connected layer consisting of 1024 neurons with a dropout rate of 0.5 during training. After this, softmax regression is used for binary classification.

We explored various alterations of our network architecture, and illustrate here the effect of simply varying the number of kernels per convolutional layer. We assessed the classification accuracy as a function of the number of kernels in layer 1, with the number of kernels in layer 2 being double this. Accuracy was calculated using cross validation, training on all but one image dataset (where an image dataset is a complete three-dimensional scan of the gut of one zebrafish), testing on the remaining image dataset, and repeating with different train/test combinations. The network accuracy initially increases with kernel number and plateaus at roughly 16 kernels, beyond which the variance in accuracy increases (Fig 2B). Therefore, increasing the number of kernels beyond approximately 16 gives little or no improvement in accuracy at the expense of model complexity and increased variability.

## Network Accuracy Across Image Datasets

We trained the ConvNet using manually labeled data from eight of the *Vibrio* image datasets and the two datasets from germ-free fish (devoid of gut bacteria) and then tested it on the remaining manually labeled *Vibrio* image dataset that was used to assess inter-human variability, described above. The agreement between the neural network and humans (mean  $\pm$  std. dev.  $0.89 \pm 0.01$ ) was indistinguishable from the inter-human agreement (mean  $\pm$  std. dev.  $0.90 \pm 0.02$ ), again excluding human 3, indicating that the ConvNet achieves the practical maximum of bacterial classification accuracy (Fig 2A). Examples of images for which all humans agreed on the classification, and in which there was disagreement, are provided in the Supplementary Text.

To further test the network's consistency across different imaging conditions we applied it separately to each of the 3D image datasets of larval zebrafish intestines. We also tested, with the same procedure and data, random forest and support vector machine classifiers to address the question of whether or not the ConvNet outperforms typical feature based learning algorithms. We first consider two experiment types: zebrafish intestines mono-associated with *Vibrio* ZWU0020 (9 image datasets, i.e. 9 complete three-dimensional scans from of different zebrafish) and germ-free zebrafish (2 image datasets). Classifier accuracy for each *Vibrio*-colonized or empty-gut image scan was determined by cross-validation, training the network using all of the other image datasets, and testing on the dataset of interest. To test the variance in accuracy due to the training process, we performed three repetitions of each train/test combination using the same data. We found that the neural network outperforms the feature based algorithms on every image dataset (Fig 3), and also shows less variation in accuracy between the different datasets. The enhanced accuracy from the neural network is especially dramatic for germ-free datasets, for which it achieves over 90% accuracy, in contrast to less than 75% for feature based methods. For a given test dataset, the training variance for the convolutional neural network is small but nonzero, indicating that the network training algorithm finds similar, but not identical, minima with different (random) initializations on the same training data. It is also small for the random forest classifier. Interestingly, it is zero for the SVM classifier, indicating that given the same dataset, the algorithm is finding the same minimum.

The random forest, support vector machine, and neural network classifiers process roughly 300, 400, and 950 images per second, respectively; i.e. the neural network runs 2-3 times faster than the feature based learning algorithms on the same data.

## Training Size and Data Augmentation

Convolutional Neural Networks famously require large amounts of training data which must often, as is the case here, be evaluated and curated by hand. To assess the scale of manual classification required for good algorithm performance, which is a key issue for future adoption of neural networks in biological image analysis, we explored the effect on the network's accuracy of varying the amount of training data. We set aside 25% of



the images from each of the Vibrio and germ-free fish image scans and trained the 195  
network using an increasing number of images from the remaining data. We increased 196  
the amount of training data in two different ways. First, we consecutively added to the 197  
training set all images from each image dataset excluding a subset of the images 198  
previously reserved for testing (labeled Test: new datasets in Fig 4A). Second, we 199  
randomly shuffled the training images from all the image scans, adding 1500 images to 200  
the training set over each iteration (labeled Train/test split in Fig 4A). For the first 201  
method, enlargement of the training set corresponds to a greater amount of data as well 202  
as data from more diverse biological sources. For the second, data size increases but the 203  
biological variation sampled is held constant. In both cases, accuracy plateaus at a 204  
number of images on the order of 10,000 (Fig 4A). The rise in accuracy with increasing 205  
training data size is only slightly more shallow with the first method, surprisingly, 206  
demonstrating that within-sample variation is sufficient to train the network. 207

Data augmentation, the alteration of input images through mirror reflections, 208  
rotations, cropping, and the addition of noise, etc., is commonly used in machine 209  
learning to enhance training dataset size and enable robust training of neural networks. 210  
To characterize the utility of data augmentation for 3D bacterial images, we focused in 211  
particular on image rotations and reflections, because the bacteria have no preferred 212  
orientation and hence augmentation by these methods creates realistic training images. 213  
We note that data augmentation is not necessary for feature based learning methods in 214  
which parity and rotational invariance can be built into the features used for 215  
classification. Obviously, augmented data is not independent of the actual training data, 216  
and so does not supply wholly new information. We were curious as to how including 217  
rotated and reflected versions of previously seen data compares, in terms of network 218  
performance, to adding entirely new data, a comparison that is useful if evaluating the 219  
necessity of performing additional imaging experiments. To test this, we compared the 220  
accuracies of the network when adding new data to that when adding rotated and 221  
reflected versions of existing data. We started with a fixed number of 1500 total objects 222  
randomly sampled from the entire set and, in the case of including new data, added 223  
another random 1500 objects at each iteration. For the augmented data, we applied 224  
random rotations and reflections to the original 1500 objects to iteratively increase the 225  
training size by 1500 objects. Each trained network was tested on the same test set of 226

objects as that of Fig 4A. As shown in Fig 4B, the addition of new data leads to a plateau in accuracy of roughly 90% while for augmented data the plateau value is around 88%. This result demonstrates that, in the context of our network, simply augmenting existing data can raise classification accuracy to nearly the optimal level achieved by new, independent data.

## Transfer Learning

We assessed the accuracy of the convolutional neural network on images of discrete gut bacteria of another species, of the genus *Pseudomonas*. Training solely on the *Vibrio* images and testing on *Pseudomonas* gives  $\sim 75\%$  accuracy (Fig 5). However, this is much lower than the  $\sim 85 - 95\%$  accuracy obtained on *Vibrio* images (Fig 4); the *Pseudomonas* species is not an exact morphological mimic of the *Vibrio* species. The *Pseudomonas* dataset is small (1190 images); using 80% of its images for de novo neural network training gives  $\sim 72\%$  accuracy in identifying *Pseudomonas* in test datasets (Fig 5). We suspected that the general similarity of each species as rod-like, few-micron-long cells would allow transfer learning, in which a model trained for one task is used as the starting point for training for another task [37,38]. Using the network weights from training on *Vibrio* image datasets, as before, as the starting values for training on the small *Pseudomonas* dataset gives over 85% accuracy in classifying *Pseudomonas* (Fig 5).

## Discussion

We find that a 3D convolutional neural network for binary classification of bacteria and non-bacterial objects in 3D microscopy data of the larval zebrafish gut yields high accuracy without unreasonably large demands on the amount of manually curated training data. Specifically, the convolutional neural network obtains human-expert-level accuracy, runs 2-3 times faster than other standard machine learning methods, and is consistent across different datasets and across planktonic bacteria from two different genera through the use of transfer learning. It reaches these performance metrics after training on fewer than 10,000 human-classified images, which require approximately 20 person-hours of manual curation to generate. Moreover, augmented data in the form of rotations and reflections of real data contributes effectively to network training, further

reducing the required manual labor. Experiments of the sort presented here typically  
involve many weeks of laboratory work. Neural network training, therefore, is a  
relatively small fraction of the total required time.

In many biological imaging experiments, including our own, variety and similarity  
are both present. Multiple distinct species or cell types may exist, each different, but  
with some morphological similarities. It is therefore useful to ask whether such  
similarities can be exploited to constrain the demands of neural network training. The  
concept of transfer learning addresses this issue, and we find that applying it to our  
bacterial images achieves high accuracy despite small labeled datasets, an observation  
that we suspect will apply to many image-based studies.

Though the data presented here came from a particular experimental system,  
consisting of fluorescently labeled bacterial species within a larval zebrafish intestine  
imaged with light sheet fluorescence microscopy, they exemplify general features of many  
contemporary three-dimensional live imaging applications, including large data size,  
high and variable backgrounds, optical aberrations, and morphological heterogeneity.  
As such, we suggest that the lessons and analysis tools provided here should be widely  
applicable to microbial communities [39] as well as eukaryotic multicellular organisms.

We expect the use of convolutional neural networks in biological image analysis to  
become increasingly widespread due to the combination of efficacy, as illustrated here,  
and the existence of user-friendly tools, such as TensorFlow, that make their  
implementation straightforward. We can imagine several extensions of the work we have  
described. Considering gut bacteria in particular, extending neural network methods to  
handle bacterial aggregates is called for by observations of a continuum of planktonic  
and aggregated morphologies [31]. Considering 3D images more generally, we note that  
the approach illustrated has as its first step detection of candidate objects (“blobs”),  
which requires choices of thresholding and filtering parameters. Alternatively,  
pixel-by-pixel segmentation is in principle possible using recently developed network  
architectures [13, 40], which could enable completely automated processing of 3D  
fluorescence images. In addition, pixel-based identification of overall morphology (for  
example, the location of the zebrafish gut) could further enhance classification accuracy,  
by incorporating anatomical information that constrains the possible locations of  
particular cell types.

## Methods

288

### Light Sheet Microscopy Image Data

289

Three-dimensional scans of the intestines of larval zebrafish, derived germ-free and colonized by fluorescently labeled bacteria prior to imaging, were obtained using light sheet fluorescence microscopy as described in Refs. [10,30,31]. All experiments involving zebrafish were carried out in accordance with protocols approved by the University of Oregon Institutional Animal Care and Use Committee.

290

291

292

293

294

The microscope was based on the design from Keller et al [6], and has been described elsewhere [30,39]. In brief: a laser is rapidly oscillated creating a thin sheet of light used to illuminate a section of the specimen, in this case, a larval zebrafish. An objective lens is seated perpendicular to the laser sheet, focusing two-dimensional images onto a sCMOS camera. The specimen is scanned through the sheet along the detection axis, thereby constructing a 3D image. The camera exposure time was 30 ms, and the laser power of the laser was 5 mW as measured between the theta-lens and excitation objective.

295

296

297

298

299

300

301

302

Of the twelve image datasets used for this work, nine were of the zebrafish commensal bacterium *Vibrio* sp. ZWU0020, one was of a *Pseudomonas* commensal sp. ZWU0006, and two were from germ-free fish, devoid of any bacteria.

303

304

305

An example 3D image dataset of the anterior “bulb” of one larval zebrafish gut is available at the link noted in the README.md file at github:

306

307

<https://github.com/rplab/Bacterial-Identification>, together with the 6 lab members’

308

labels for each detected object in the volume, the convolutional neural network’s

309

classification, and each of the extracted region-of-interest voxels. Other image sets are

310

available upon request; for each zebrafish gut, the full image dataset is roughly 1 GB in

311

size.

312

### Segmentation and Blob Detection

313

Rough segmentation of the intestine was performed using histogram equalization of each

314

individual z-stack followed by a moving average over 30 consecutive images in the

315

z-stack followed by hard thresholding to create a binary mask that overestimated the

316

size of the intestine. While extremely rough, this technique requires no manual editing 317  
or outlining. After this, blob detection was performed using the difference of Gaussians 318  
technique from the scikit-image library on each two-dimensional image, and the blobs 319  
were linked together across consecutive images in each stack. Regions 28x28x8 pixels in 320  
size centered at each detected blob were then saved to be labeled by hand as either a 321  
bacterium or noise. The code for extracting the regions of interest is publicly available 322  
on Github at <https://github.com/rplab/Bacterial-Identification>. 323

From the 12 datasets, 20,929 images were hand labeled of which 38% were bacteria 324  
and 62% were noise. Hand labeling took roughly 1-2 hours per scan. All of the 28x28x8 325  
pixel images and the corresponding labels are available from links in the README.md 326  
file at the Github repository <https://github.com/rplab/Bacterial-Identification>. 327

All code for the project was written in Python. 328

## Random Forest and Support Vector Machine Classifiers 329

Over sixty features were created initially. These were assessed using scikit-learn's 330  
`feature_importances_`, from which the thirty one most helpful features were retained. 331  
The features used included geometric properties obtained by ellipse-fitting and 332  
texture-based characteristics; a detailed list is provided in the python code `features.py` 333  
provided on Github: <https://github.com/rplab/Bacterial-Identification>. The data were 334  
tested using both a random forest and support vector classifier from the scikit-learn 335  
library. The random forest used 500 estimators. The support vector classifier from 336  
sci-kit learn, `sklearn.svm.SVC()`, was tested over a range of parameters and kernels 337  
using scikit-learn's `GridSearchCV` which yielded highest accuracy when using a radial 338  
basis function kernel with penalty  $C=1$ . 339

## Convolutional Neural Network 340

The 3D convolutional neural network was created using Google's TensorFlow. Each 341  
input image was 28x28x8 pixels. The network consisted of two convolutional layers 342  
followed by a fully connected layer. The first layer was composed of 16, 5x5x2 kernels of 343  
stride 2 and same padding followed by 2x2x2 max pooling, the second layer contained 344  
32 5x5x2 kernels of the same stride and padding and was also followed by 2x2x2 max 345

pooling. We chose to double the number of kernels after max pooling as in [41]. After 346  
the final convolutional layer we employed a fully connected layer consisting of 1024 347  
neurons. The classes were then determined using a softmax layer. The network had a 348  
dropout of 0.5, a learning rate of 0.0001 and the data was trained over 120 epochs 349  
randomly rotating and reflecting each image over each epoch unless otherwise specified. 350  
The weights were updated using the Adam optimization method and we use leaky-ReLu 351  
activation functions. During each epoch of training, each input image has a fifty percent 352  
probability of receiving a reflection in x, y and z followed by a fifty percent probability 353  
of subsequently being transposed. This particular scheme was chosen due to its low 354  
computational load. We have made the code for this convolutional neural network is 355  
available on Github at <https://github.com/rplab/Bacterial-Identification>. 356

## Computer Specs and Timing 357

The code was implemented on using python 3.5 on Ubuntu 16.04, with a Intel Core 358  
i7-4790 CPU with an Nvidia GeForce GTX 1060 graphics card on a computer with 32 359  
GB of RAM. With this hardware it took roughly one minute to train and create the 360  
features for the RF and SVC using about 17,000 images, and roughly one hour to train 361  
the 3D ConvNet on the same number of images. 362

## Acknowledgments 363

We thank Rose Sockol and the University of Oregon Zebrafish Facility staff for fish 364  
husbandry, Sophie Sichel for preparation of germ-free zebrafish, and many members of 365  
the authors' research group for useful comments and conversations. 366

## References

1. Burgstaller G, Vierkotten S, Lindner M, Königshoff M, Eickelberg O.  
Multidimensional immunolabeling and 4D time-lapse imaging of vital ex vivo  
lung tissue. *American Journal of Physiology-Lung Cellular and Molecular  
Physiology*. 2015;309(4):L323–L332. doi:10.1152/ajplung.00061.2015.

2. Weigert R, Porat-Shliom N, Amornphimoltham P. Imaging cell biology in live animals: Ready for prime time. *The Journal of Cell Biology*. 2013;201(7):969–979. doi:10.1083/jcb.201212130.
3. Carvalho L, Heisenberg CP. In: *Imaging Zebrafish Embryos by Two-Photon Excitation Time-Lapse Microscopy*. Totowa, NJ: Humana Press; 2009. p. 273–287. Available from: [https://doi.org/10.1007/978-1-60327-977-2\\_17](https://doi.org/10.1007/978-1-60327-977-2_17).
4. Ahrens MB, Li JM, Orger MB, Robson DN, Schier AF, Engert F, et al. Brain-wide neuronal dynamics during motor adaptation in zebrafish. *Nature*. 2012;485:471 EP –.
5. Svoboda K, Yasuda R. Principles of Two-Photon Excitation Microscopy and Its Applications to Neuroscience. *Neuron*. 2006;50(6):823 – 839. doi:<https://doi.org/10.1016/j.neuron.2006.05.019>.
6. Keller PJ. Imaging Morphogenesis: Technological Advances and Biological Insights. *Science*. 2013;340(6137). doi:10.1126/science.1234168.
7. Keller PJ, Schmidt AD, Wittbrodt J, Stelzer EHK. Reconstruction of Zebrafish Early Embryonic Development by Scanned Light Sheet Microscopy. *Science*. 2008;322(5904):1065–1069. doi:10.1126/science.1162493.
8. Keller PJ, Ahrens MB. Visualizing Whole-Brain Activity and Development at the Single-Cell Level Using Light-Sheet Microscopy. *Neuron*. 2013;85(3):462–483. doi:10.1016/j.neuron.2014.12.039.
9. Maizel A, von Wangenheim D, Federici F, Haseloff J, Stelzer EHK. High-resolution live imaging of plant growth in near physiological bright conditions using light sheet fluorescence microscopy. *The Plant Journal*. 2011;68(2):377–385. doi:10.1111/j.1365-313X.2011.04692.x.
10. Wiles TJ, Jemielita M, Baker RP, Schlomann BH, Logan SL, Ganz J, et al. Host Gut Motility Promotes Competitive Exclusion within a Model Intestinal Microbiota. *PLOS Biology*. 2016;14(7):1–24. doi:10.1371/journal.pbio.1002517.

11. Huisken J, Stainier DYR. Selective plane illumination microscopy techniques in developmental biology. *Development*. 2009;136(12):1963–1975.  
doi:10.1242/dev.022426.
12. Pantazis P, Supatto W. Advances in whole-embryo imaging: a quantitative transition is underway. *Nature Reviews Molecular Cell Biology*. 2014;15:327 EP –.
13. Ronneberger O, Fischer P, Brox T. U-Net: Convolutional Networks for Biomedical Image Segmentation. In: *Medical Image Computing and Computer-Assisted Intervention (MICCAI)*. vol. 9351 of LNCS. Springer; 2015. p. 234–241. Available from:  
<http://lmb.informatik.uni-freiburg.de/Publications/2015/RFB15a>.
14. Krizhevsky A, Sutskever I, Hinton GE. ImageNet Classification with Deep Convolutional Neural Networks. In: Pereira F, Burges CJC, Bottou L, Weinberger KQ, editors. *Advances in Neural Information Processing Systems 25*. Curran Associates, Inc.; 2012. p. 1097–1105. Available from: <http://papers.nips.cc/paper/4824-imagenet-classification-with-deep-convolutional-neural-networks.pdf>.
15. Esteva A, Kuprel B, Novoa RA, Ko J, Swetter SM, Blau HM, et al. Dermatologist-level classification of skin cancer with deep neural networks. *Nature*. 2017;542:115 EP –.
16. Lecun Y, Bottou L, Bengio Y, Haffner P. Gradient-based learning applied to document recognition. In: *Proceedings of the IEEE*; 1998. p. 2278–2324.
17. Abadi M, Barham P, Chen J, Chen Z, Davis A, Dean J, et al. TensorFlow: A system for large-scale machine learning. In: *12th USENIX Symposium on Operating Systems Design and Implementation (OSDI 16)*; 2016. p. 265–283. Available from: <https://www.usenix.org/system/files/conference/osdi16/osdi16-abadi.pdf>.
18. Theano Development Team. Theano: A Python framework for fast computation of mathematical expressions. *arXiv e-prints*. 2016;abs/1605.02688.



19. Chollet F, et al.. Keras; 2015. <https://github.com/fchollet/keras>.
20. Collobert R, Kavukcuoglu K, Farabet C. Torch7: A Matlab-like Environment for Machine Learning. In: BigLearn, NIPS Workshop; 2011.
21. Zeiler MD, Fergus R. Visualizing and Understanding Convolutional Networks. In: Fleet D, Pajdla T, Schiele B, Tuytelaars T, editors. Computer Vision – ECCV 2014. Cham: Springer International Publishing; 2014. p. 818–833.
22. Zhou SK, Greenspan H, Shen D. In: Deep Learning for Medical Image Analysis. Academic Press; 2017. Available from: <https://www.sciencedirect.com/science/article/pii/B9780128104088000262>.
23. Dong B, Shao L, Costa MD, Bandmann O, Frangi AF. Deep learning for automatic cell detection in wide-field microscopy zebrafish images. In: 2015 IEEE 12th International Symposium on Biomedical Imaging (ISBI); 2015. p. 772–776.
24. Van Valen DA, Kudo T, Lane KM, Macklin DN, Quach NT, DeFelice MM, et al. Deep Learning Automates the Quantitative Analysis of Individual Cells in Live-Cell Imaging Experiments. PLOS Computational Biology. 2016;12(11):1–24. doi:10.1371/journal.pcbi.1005177.
25. Arganda-Carreras I, Kaynig V, Rueden C, Eliceiri KW, Schindelin J, Cardona A, et al. Trainable Weka Segmentation: a machine learning tool for microscopy pixel classification. Bioinformatics. 2017;33(15):2424–2426. doi:10.1093/bioinformatics/btx180.
26. Ning F, Delhomme D, LeCun Y, Piano F, Bottou L, Barbano PE. Toward automatic phenotyping of developing embryos from videos. IEEE Transactions on Image Processing. 2005;14(9):1360–1371. doi:10.1109/TIP.2005.852470.
27. Christ PF, Elshaer MEA, Ettliger F, Tatavarty S, Bickel M, Bilic P, et al. Automatic Liver and Lesion Segmentation in CT Using Cascaded Fully Convolutional Neural Networks and 3D Conditional Random Fields. In: Ourselin S, Joskowicz L, Sabuncu MR, Unal G, Wells W, editors. Medical Image Computing and Computer-Assisted Intervention – MICCAI 2016. Cham: Springer International Publishing; 2016. p. 415–423.

28. Kraus OZ, Grys BT, Ba J, Chong Y, Frey BJ, Boone C, et al. Automated analysis of high-content microscopy data with deep learning. *Molecular Systems Biology*. 2017;13(4). doi:10.15252/msb.20177551.
29. Zhan M, Crane MM, Entchev EV, Caballero A, Fernandes de Abreu DA, Ch'ng Q, et al. Automated Processing of Imaging Data through Multi-tiered Classification of Biological Structures Illustrated Using *Caenorhabditis elegans*. *PLOS Computational Biology*. 2015;11(4):1–21. doi:10.1371/journal.pcbi.1004194.
30. Jemielita M, Taormina MJ, Burns AR, Hampton JS, Rolig AS, Guillemin K, et al. Spatial and Temporal Features of the Growth of a Bacterial Species Colonizing the Zebrafish Gut. *mBio*. 2014;5(6):e01751–14. doi:10.1128/mBio.01751-14.
31. Wiles TJ, Wall ES, Schlomann BH, Hay EA, Parthasarathy R, Guillemin K. Modernized tools for streamlined genetic manipulation of wild and diverse symbiotic bacteria. *bioRxiv*. 2017;doi:10.1101/202861.
32. Logan SL, Thomas J, Yan J, Baker RP, Shields DS, Xavier JB, et al. The *Vibrio cholerae* type VI secretion system can modulate host intestinal mechanics to displace gut bacterial symbionts. *Proceedings of the National Academy of Sciences*. 2018;115(16):E3779–E3787. doi:10.1073/pnas.1720133115.
33. Taormina MJ, Hay EA, Parthasarathy R. Passive and Active Microrheology of the Intestinal Fluid of the Larval Zebrafish. *Biophysical Journal*. 2017;113(4):957 – 965. doi:<https://doi.org/10.1016/j.bpj.2017.06.069>.
34. Milligan-Myhre K, Charette JR, Phennicie RT, Stephens WZ, Rawls JF, Guillemin K, et al. Chapter 4 - Study of Host–Microbe Interactions in Zebrafish. In: Detrich HW, Westerfield M, Zon LI, editors. *The Zebrafish: Disease Models and Chemical Screens*. vol. 105 of *Methods in Cell Biology*. Academic Press; 2011. p. 87 – 116. Available from: <http://www.sciencedirect.com/science/article/pii/B9780123813206000047>.
35. Stephens WZ, Wiles TJ, Martinez ES, Jemielita M, Burns AR, Parthasarathy R, et al. Identification of Population Bottlenecks and Colonization Factors during Assembly of Bacterial Communities within the Zebrafish Intestine. *mBio*. 2015;6(6):e01163–15. doi:10.1128/mBio.01163-15.

36. Zac Stephens W, Burns AR, Stagaman K, Wong S, Rawls JF, Guillemin K, et al. The composition of the zebrafish intestinal microbial community varies across development. *ISME J.* 2016;10(3):644–654. doi:10.1038/ismej.2015.140.
37. Yosinski J, Clune J, Bengio Y, Lipson H. How Transferable Are Features in Deep Neural Networks? In: *Proceedings of the 27th International Conference on Neural Information Processing Systems - Volume 2. NIPS'14.* Cambridge, MA, USA: MIT Press; 2014. p. 3320–3328. Available from: <http://dl.acm.org/citation.cfm?id=2969033.2969197>.
38. Donahue J, Jia Y, Vinyals O, Hoffman J, Zhang N, Tzeng E, et al. DeCAF: A Deep Convolutional Activation Feature for Generic Visual Recognition. In: Xing EP, Jebara T, editors. *Proceedings of the 31st International Conference on Machine Learning.* vol. 32 of *Proceedings of Machine Learning Research.* Beijing, China: PMLR; 2014. p. 647–655. Available from: <http://proceedings.mlr.press/v32/donahue14.html>.
39. Taormina MJ, Jemielita M, Stephens WZ, Burns AR, Troll JV, Parthasarathy R, et al. Investigating Bacterial-Animal Symbioses with Light Sheet Microscopy. *The Biological Bulletin.* 2012;223(1):7–20. doi:10.1086/BBLv223n1p7.
40. Ciresan D, Giusti A, Gambardella LM, Schmidhuber J. Deep Neural Networks Segment Neuronal Membranes in Electron Microscopy Images. In: Pereira F, Burges CJC, Bottou L, Weinberger KQ, editors. *Advances in Neural Information Processing Systems 25.* Curran Associates, Inc.; 2012. p. 2843–2851. Available from: <http://papers.nips.cc/paper/4741-deep-neural-networks-segment-neuronal-membranes-in-electron-microscopy-images.pdf>.
41. Simonyan K, Zisserman A. Very Deep Convolutional Networks for Large-Scale Image Recognition. *CoRR.* 2014;abs/1409.1556.

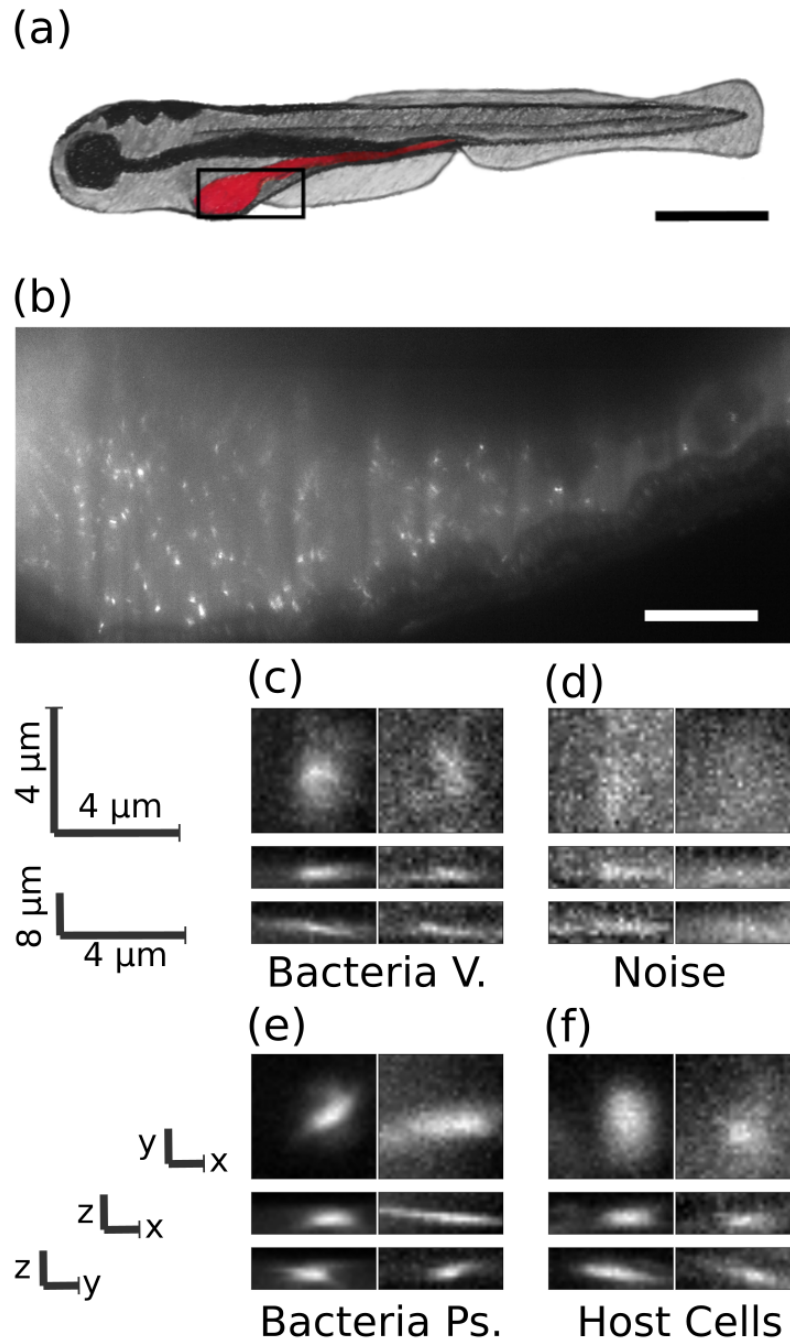

**Fig 1. Images of bacteria in the intestine of larval zebrafish.** a) Schematic illustration of a larval zebrafish with the intestine highlighted in red. Scale bar: 0.5 mm. b) Single optical section from light sheet fluorescence microscopy of the anterior intestine of a larval zebrafish colonized by GFP expressing bacteria of the commensal *Vibrio* species ZWU0020. Scale bar: 50 microns. c) z, y and x projections from 28x28x8 pixel regions of representative individual *Vibrio* bacteria, d) non-bacterial noise, e) individual bacteria of the genus *Pseudomonas*, species ZWU0006, and f) autofluorescent zebrafish cells.

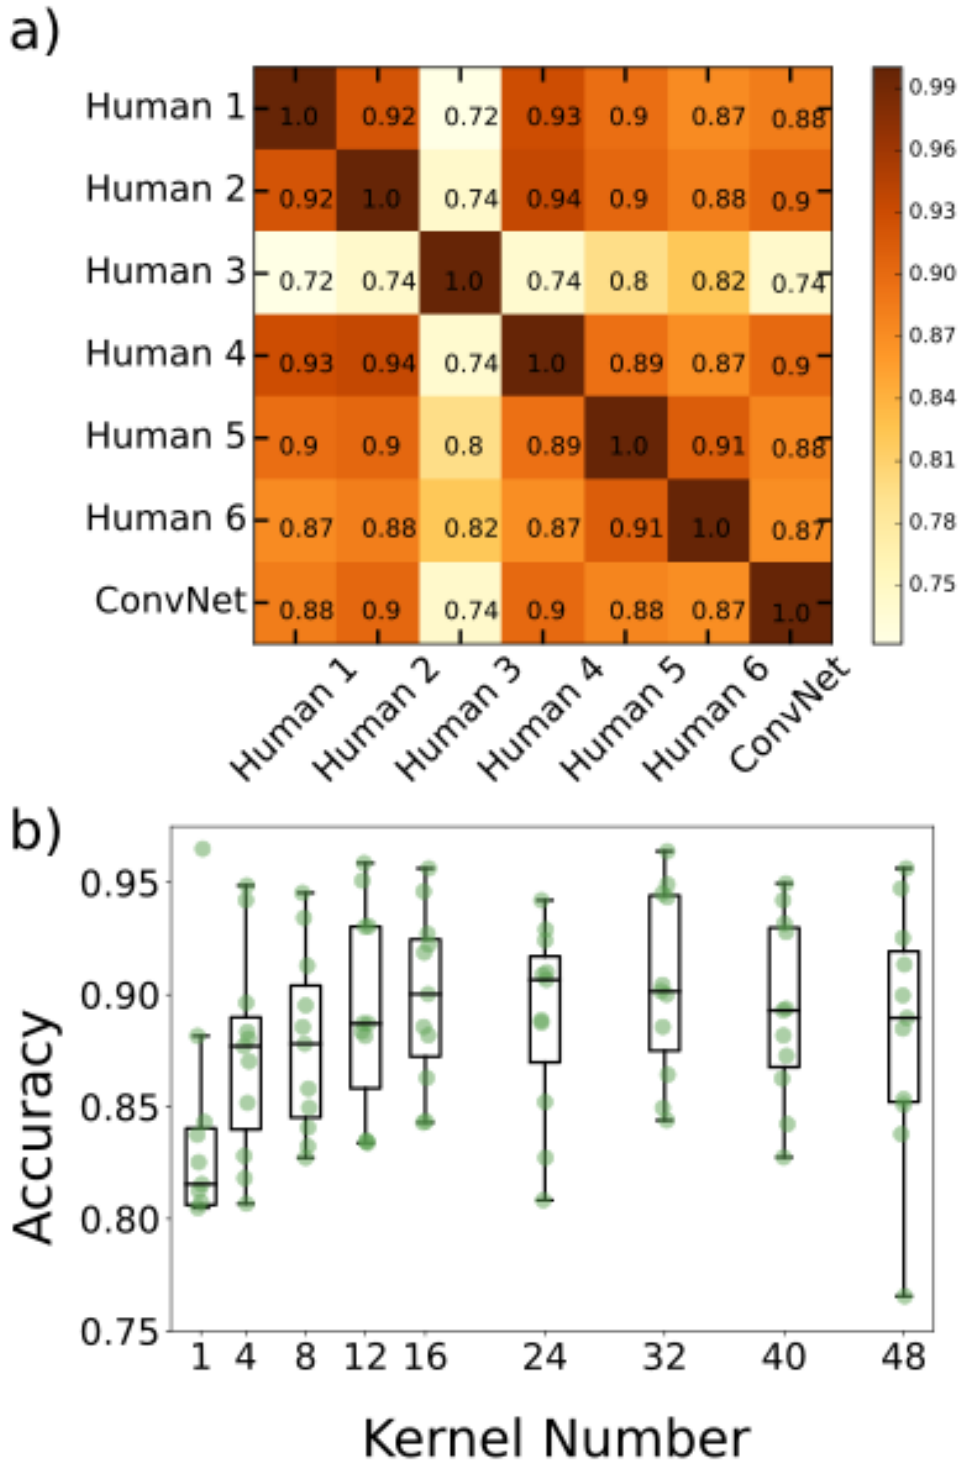

**Fig 2. Creation of the 3-D convolutional neural network.** a) Agreement matrix between six individuals (members of the authors' research group), evaluated on a single dataset of images of *Vibrio* bacteria, and between those humans and the convolutional neural network. b) Accuracy vs number of kernels per layer using cross validation across the various imaging datasets, where the x-axis denotes the number of kernels in the first convolutional layer. The second convolutional layer for each plotted point has twice as many kernels as the first.

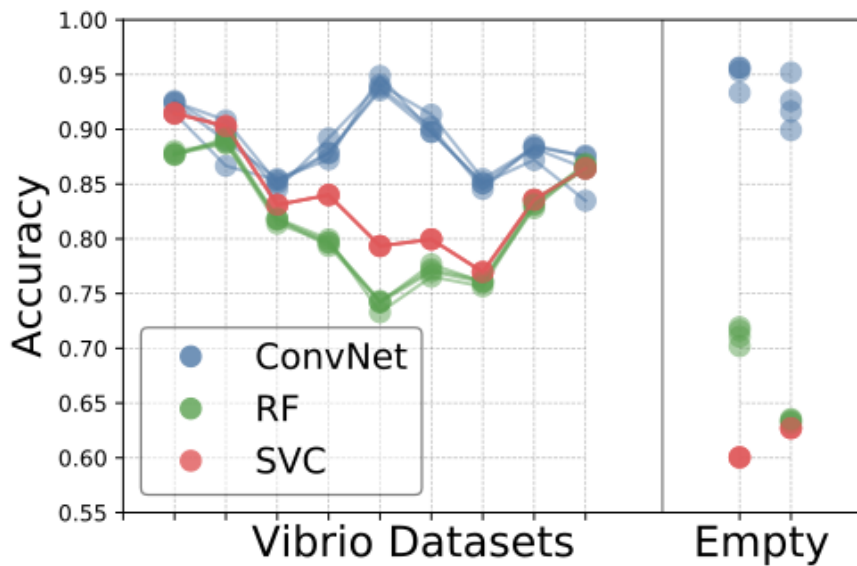

**Fig 3. Comparison of Convnet and feature based learning algorithms across all datasets.** Comparison of accuracies for the various learning algorithms (convolutional neural network, support vector classifier, and random forest) across different Vibrio image datasets, as well as two image datasets from fish devoid of gut bacteria. Each accuracy was determined by training on the data from all of the other datasets, and testing on the dataset of interest.

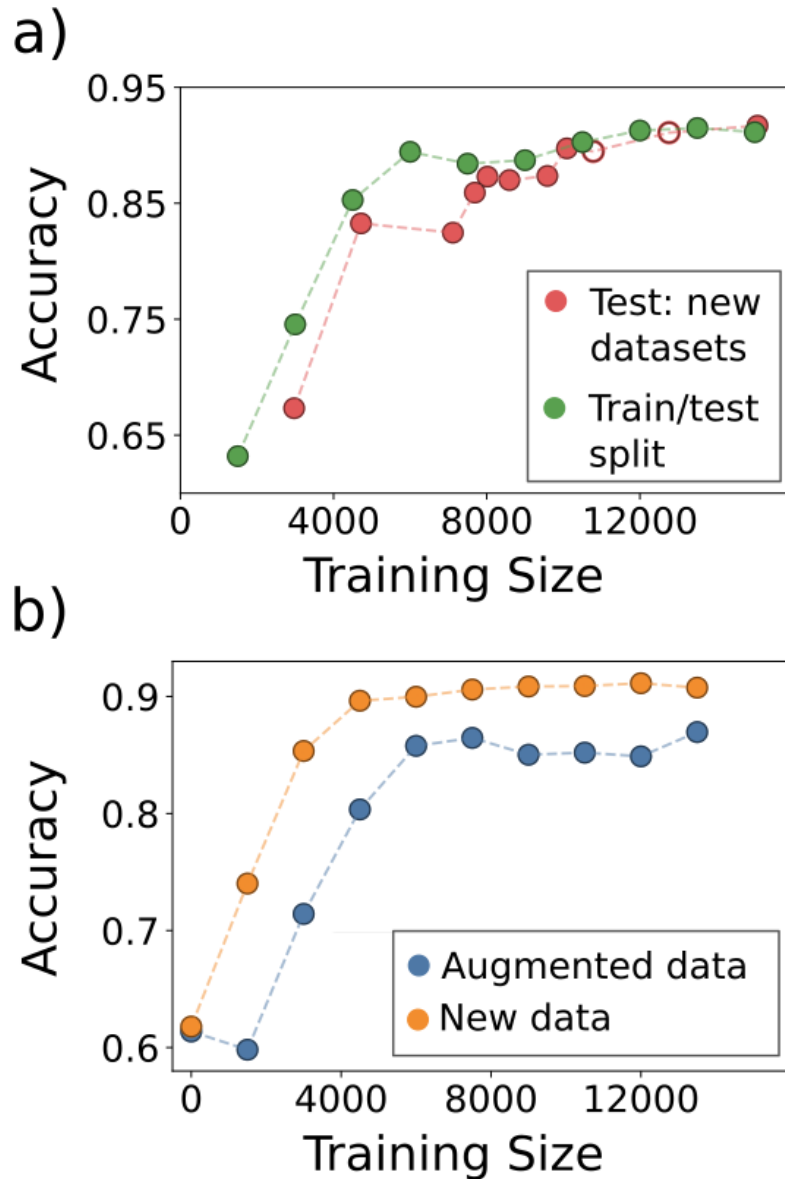

**Fig 4. Data augmentation.** Examining the accuracy of the CNN as a function of a) varying the training data size by adding images from biologically distinct datasets (Test: new datasets) or by adding images randomly from the full set of images (Train/test split), and b) transformation of the data by image rotations and reflections. In (a), the two empty circles represent the inclusion of the datasets from empty (germ-free) zebrafish intestines.

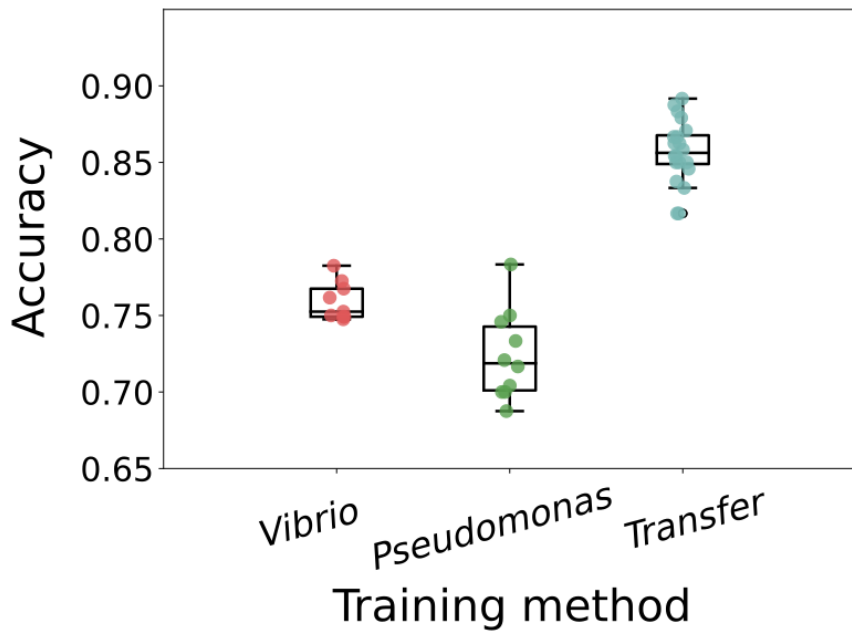

**Fig 5. Transfer Learning on New Bacterial Species.** The accuracy of Pseudomonas classification with convolutional neural networks trained in different ways. “Vibrio” indicates training on images of Vibrio bacteria, “Pseudomonas” indicates training on the small Pseudomonas image dataset, and “Transfer” indicates using the Vibrio-derived network weights as the starting point for training on Pseudomonas images. For training only on Vibrio images, the different data points come from random weight initialization, random data ordering, and random augmentation. For training only on Pseudomonas images, and for transfer learning, the different data points are from random train/test splits of the Pseudomonas data.
